# Supplementary material
Source: HighWire-hosted journal article supplement (https://erj.ersjournals.com/content/55/4/1901240)
Supplement: inline-supplementary-material-1 [file inline-supplementary-material-1.pdf]

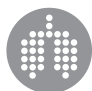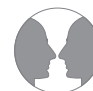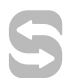

SHAREABLE PDF

# Clinical efficacy and safety of fluoroquinolone containing regimens in patients with *Mycobacterium avium* complex pulmonary disease

Hadeel Khadawardi<sup>1,2,3</sup>, Theodore K. Marras<sup>1,2</sup>, Mahtab Mehrabi<sup>2</sup> and Sarah K. Brode<sup>1,2,3</sup>

**Affiliations:** <sup>1</sup>Dept of Medicine, University of Toronto, Toronto, ON, Canada. <sup>2</sup>Joint Division of Respiriology, Dept of Medicine, University Health Network and Sinai Health System, Toronto, ON, Canada. <sup>3</sup>West Park Healthcare Centre, Toronto, ON, Canada.

**Correspondence:** Sarah K. Brode, Joint Division of Respiriology, Dept of Medicine, University Health Network and Sinai Health System, Toronto Western Hospital, 399 Bathurst St. 7E-453, Toronto, ON M5T 2S8, Canada. E-mail: sarah.brode@uhn.ca

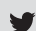

@ERSpublications

Fluoroquinolone containing regimens for *Mycobacterium avium* complex pulmonary disease demonstrated similar treatment outcomes, but more adverse events, than standard triple therapy <http://bit.ly/2RdlFpa>

**Cite this article as:** Khadawardi H, Marras TK, Mehrabi M, *et al.* Clinical efficacy and safety of fluoroquinolone containing regimens in patients with *Mycobacterium avium* complex pulmonary disease. *Eur Respir J* 2020; 55: 1901240 [<https://doi.org/10.1183/13993003.01240-2019>].

This single-page version can be shared freely online.

## To the Editor:

*Mycobacterium avium* complex pulmonary disease (MAC-PD) is an increasing problem worldwide [1]. The American Thoracic Society/Infectious Diseases Society of America (ATS/IDSA) guidelines recommend a macrolide-ethambutol-rifamycin combination as first-line treatment for MAC-PD (standard triple therapy) [2]. This therapy results in microbiological success in only 52–60% of patients [3, 4]. Treatment discontinuation or modification due to toxicity is common [5, 6]. Fluoroquinolones are frequently prescribed for MAC-PD [7]. Although favourable activity has been shown *in vitro* and in mouse models [8], there is little clinical evidence supporting their efficacy and safety for MAC-PD [9–11]. We sought to investigate treatment outcomes and adverse events among MAC-PD patients treated with fluoroquinolone-containing therapy *versus* standard triple therapy.
